# Supplementary material for: Polycyclic Phenol Derivatives from the Leaves of Spermacoce latifolia and Their Antibacterial and α-Glucosidase Inhibitory Activity
Source: MDPI journal article supplement (doi:10.3390/molecules27103334), 2022-05-22

**Polycyclic phenol derivatives from the leaves of *Spermacoce latifolia* and their antibacterial and  $\alpha$ -glucosidase inhibitory activity.**

Shao-Bo Liu <sup>1,†</sup>, Lei Zeng <sup>2,†</sup>, Qiao-Lin Xu <sup>2,\*</sup>, Ying-Le Chen <sup>2</sup>, Tao Lou <sup>1</sup>, Shan-Xuan Zhang <sup>1</sup> and Jian-Wen Tan <sup>1,\*</sup>

<sup>1</sup> State Key Laboratory for Conservation and Utilization of Subtropical Agro-bioresources/Guangdong Key Laboratory for Innovative Development and Utilization of Forest Plant Germplasm,

College of Forestry and Landscape Architecture, South China Agricultural University,

Guangzhou 510642, China; sbliu0511@126.com (S.-B.L.); ltiao99@yeah.net (T.L.); sxzhang@163.com (S.-X.Z.)

<sup>2</sup> Guangdong Provincial Key Laboratory of Silviculture, Protection and Utilization, Guangdong Academy of Forestry, Guangzhou 510520, China; zenglei@sinogaf.cn (L.Z.); cyingl@sinogaf.cn (Y.-L.C.)

\* Correspondence: qlxu@sinogaf.cn (Q.-L.X.); jwtan@scau.edu.cn (J.-W.T.)

† These authors contributed equally to this work.

## Table of Contents:

|                                                                     |    |
|---------------------------------------------------------------------|----|
| Figure S1: HR-ESI-MS(–) spectrum of compound <b>1</b> .....         | 3  |
| Figure S2: <sup>1</sup> H NMR spectrum of compound <b>1</b> .....   | 4  |
| Figure S3: <sup>13</sup> C NMR spectrum of compound <b>1</b> .....  | 5  |
| Figure S4: HSQC spectrum of compound <b>1</b> .....                 | 6  |
| Figure S5: HMBC spectrum of compound <b>1</b> .....                 | 7  |
| Figure S6: HR-ESI-MS(–) spectrum of compound <b>2</b> .....         | 8  |
| Figure S7: <sup>1</sup> H NMR spectrum of compound <b>2</b> .....   | 9  |
| Figure S8: <sup>13</sup> C NMR spectrum of compound <b>2</b> .....  | 10 |
| Figure S9: HSQC spectrum of compound <b>2</b> .....                 | 11 |
| Figure S10: HMBC spectrum of compound <b>2</b> .....                | 12 |
| Figure S11: HR-ESI-MS(+) spectrum of compound <b>8</b> .....        | 13 |
| Figure S12: <sup>1</sup> H NMR spectrum of compound <b>8</b> .....  | 14 |
| Figure S13: <sup>13</sup> C NMR spectrum of compound <b>8</b> ..... | 15 |
| Figure S14: HSQC spectrum of compound <b>8</b> .....                | 16 |
| Figure S15: HMBC spectrum of compound <b>8</b> .....                | 17 |

Figure S1: HR-ESI-MS(–) of compound 1

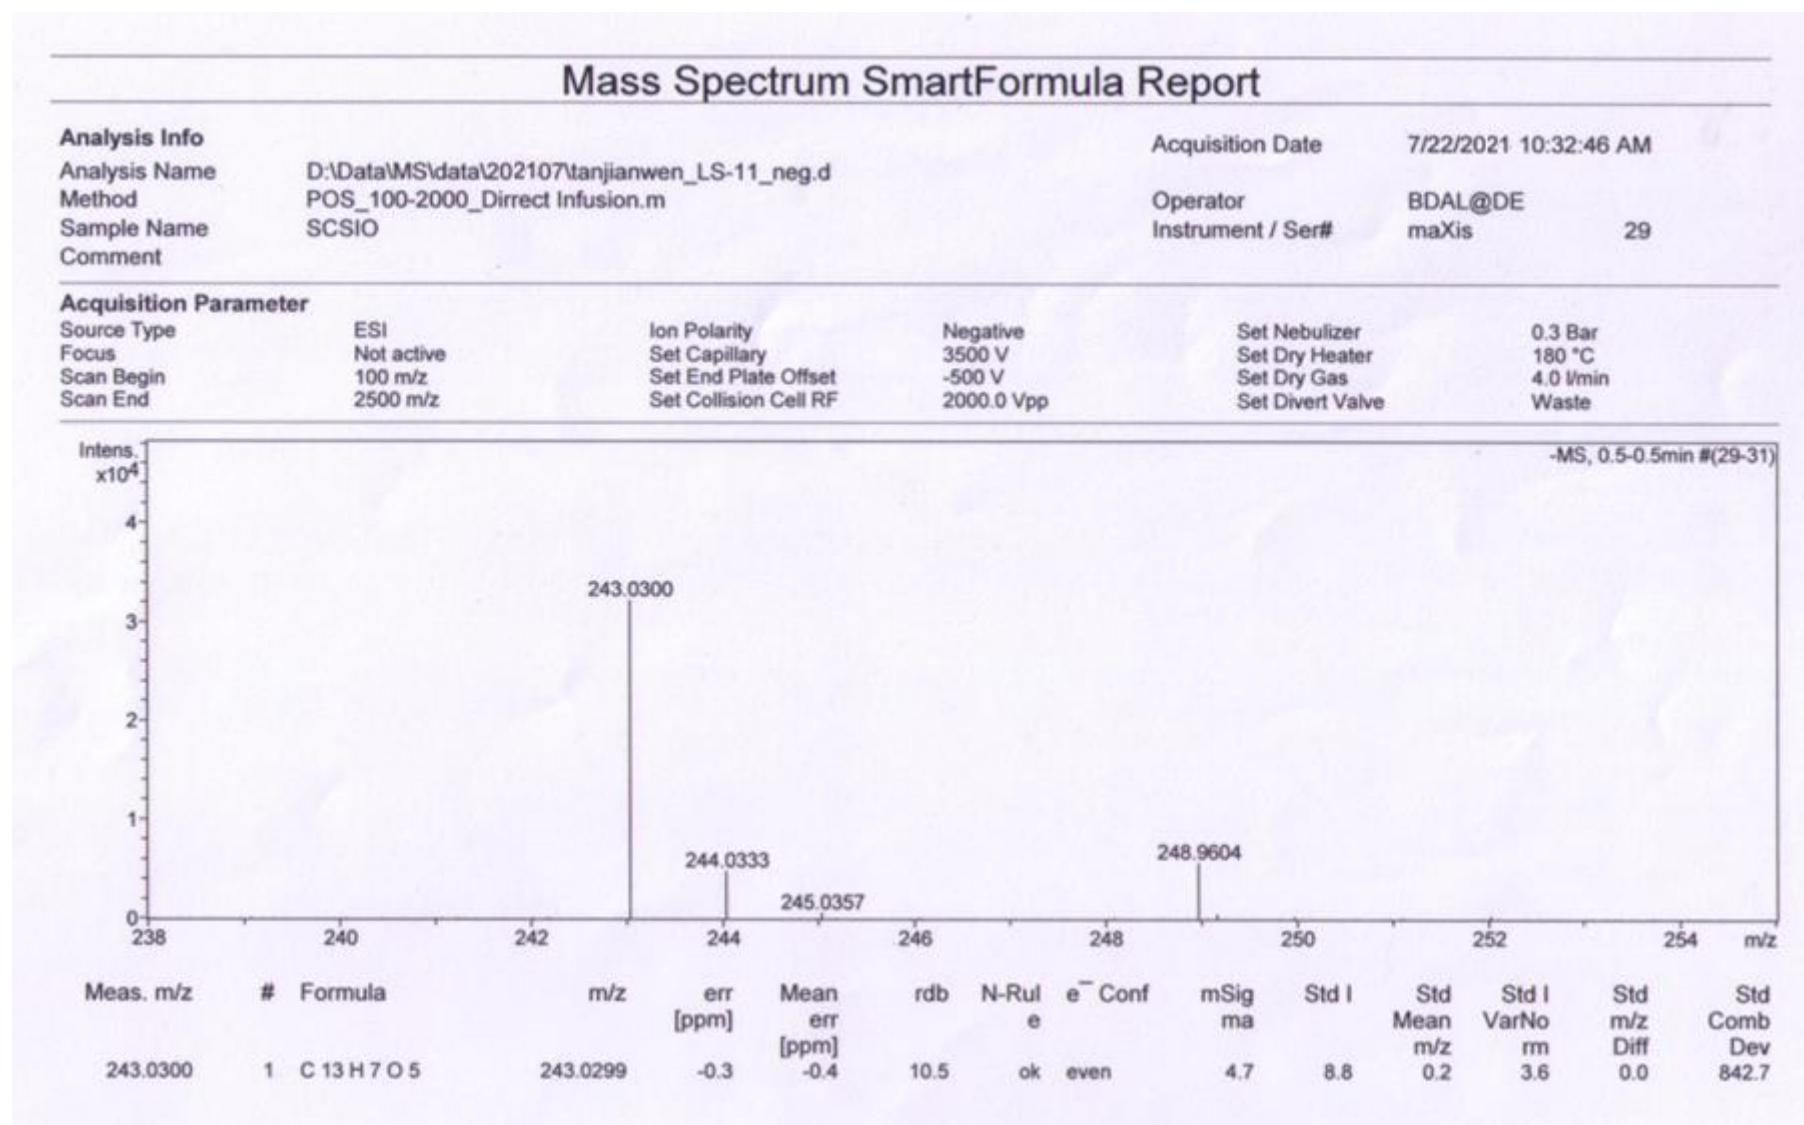

Figure S2:  $^1\text{H}$ -NMR spectrum of compound **1**

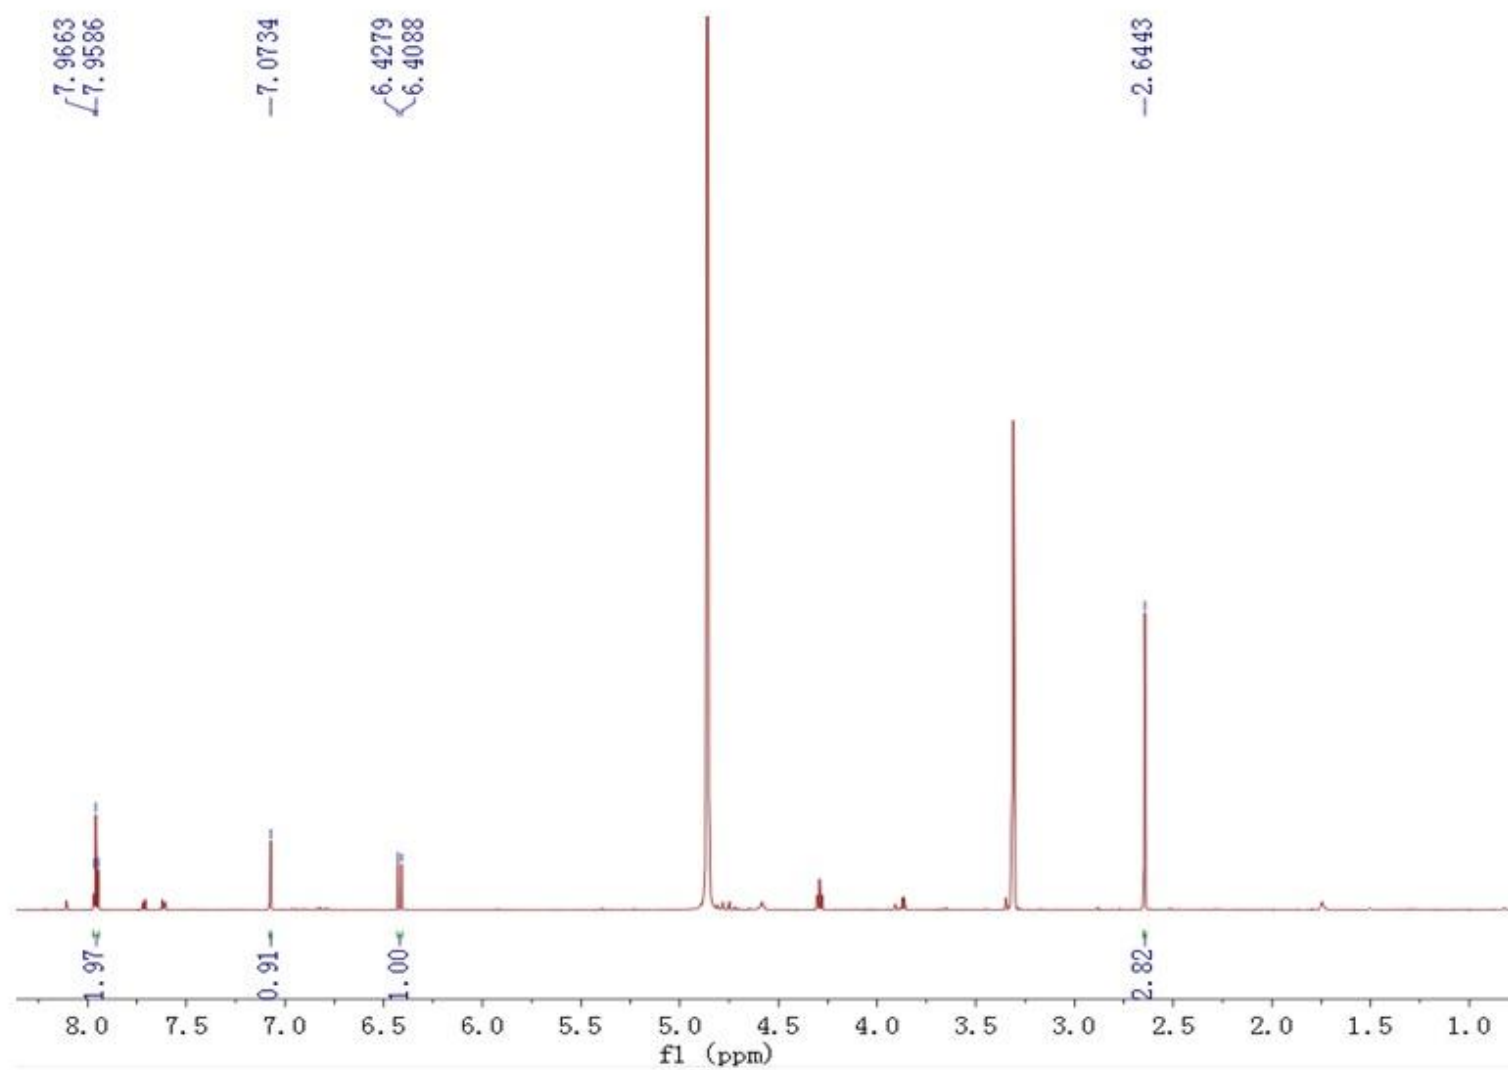

Figure S3:  $^{13}\text{C}$ -NMR spectrum of compound **1**

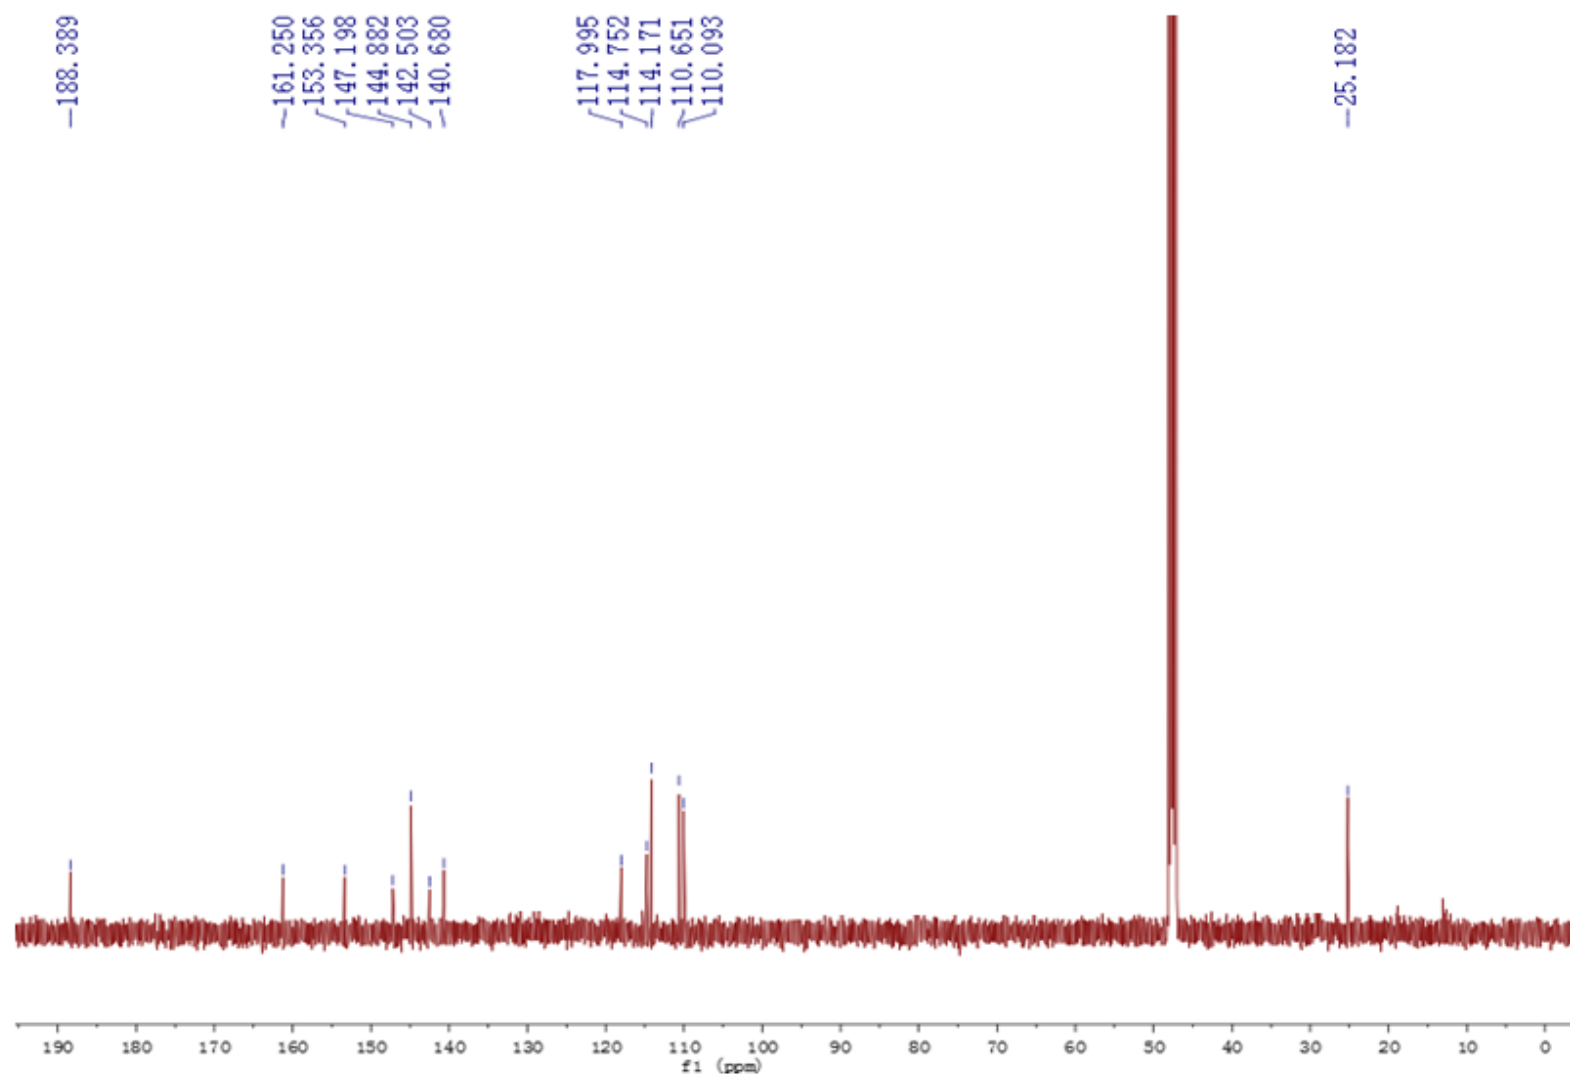

Figure S4: HSQC spectrum of compound **1**

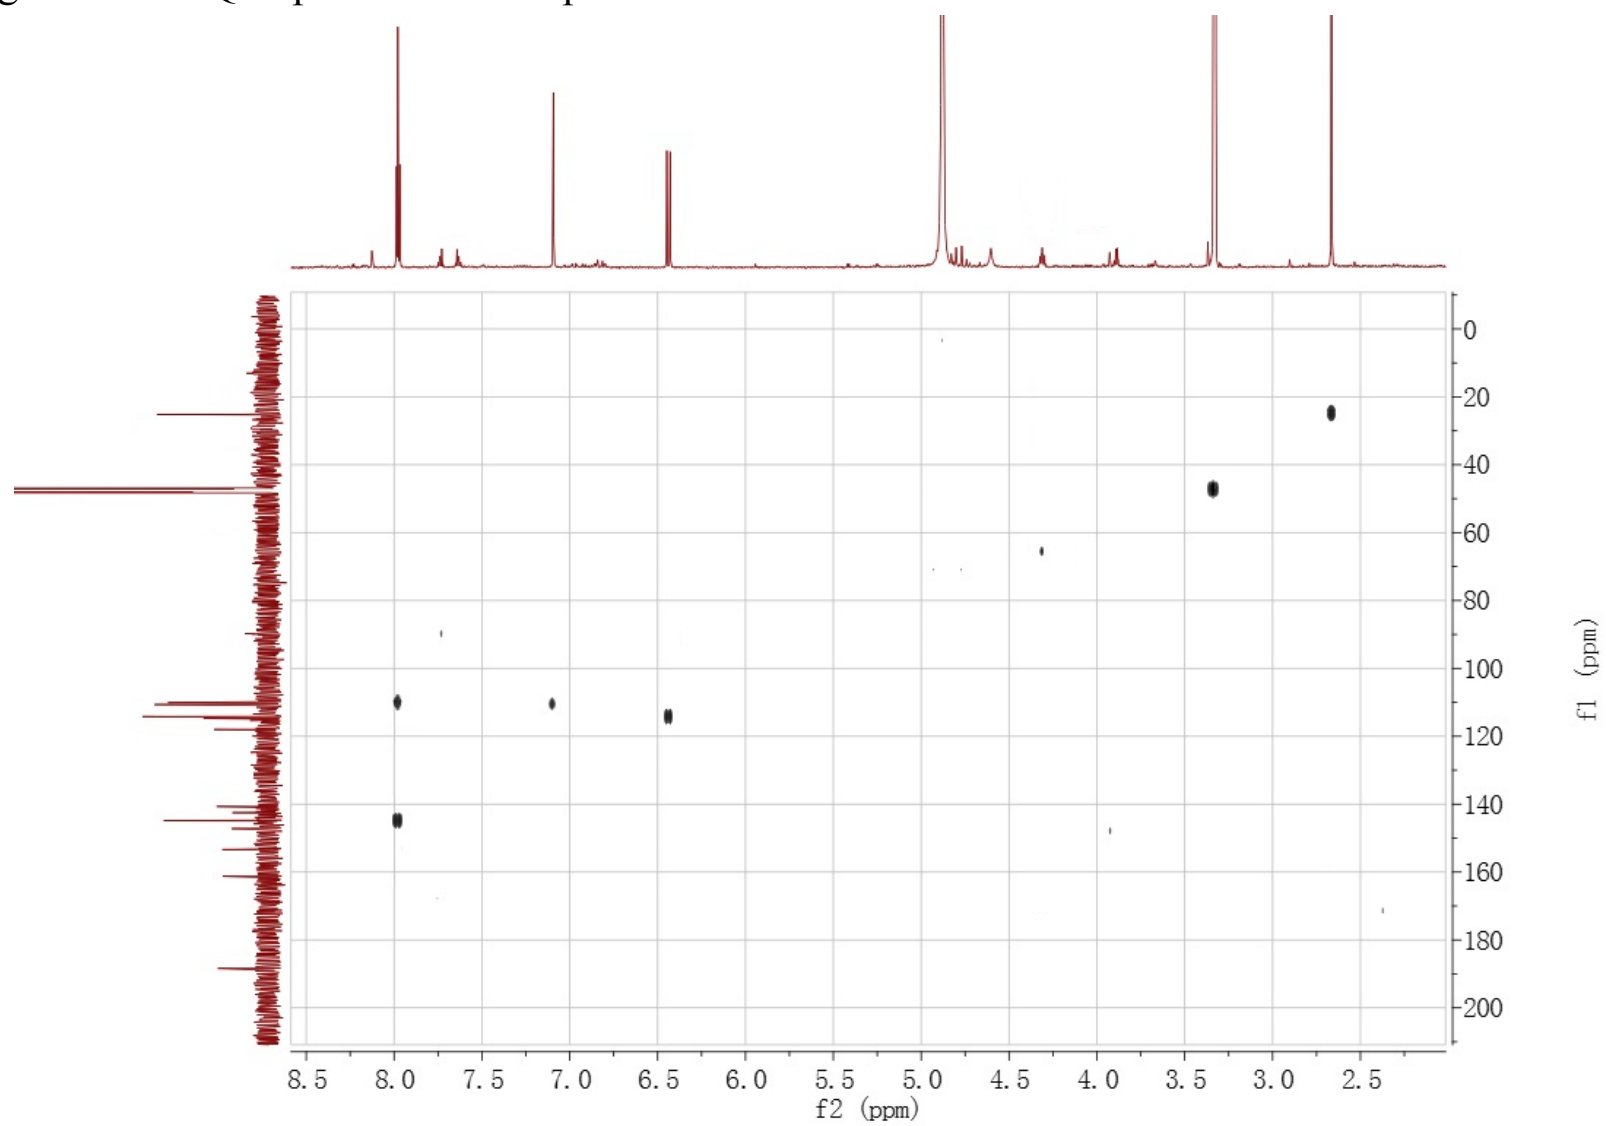

Figure S5: HMBC spectrum of compound **1**

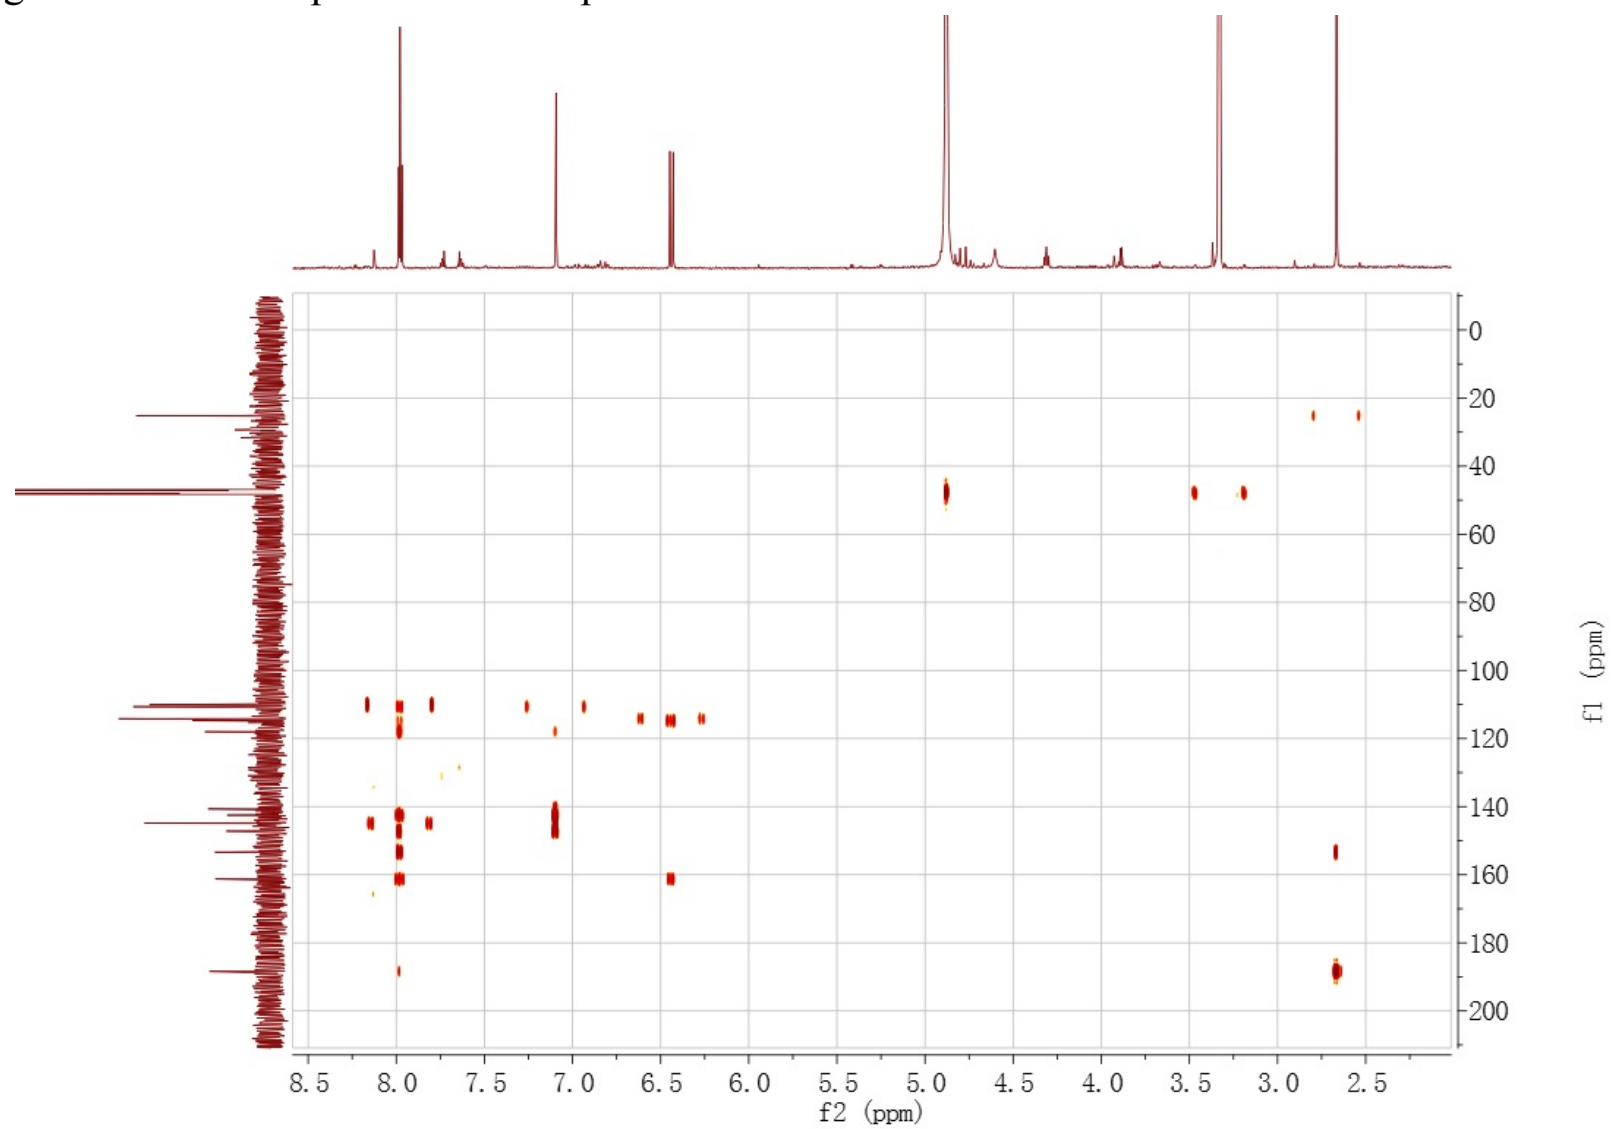

Figure S6: HR-ESI-MS(−) of compound 2

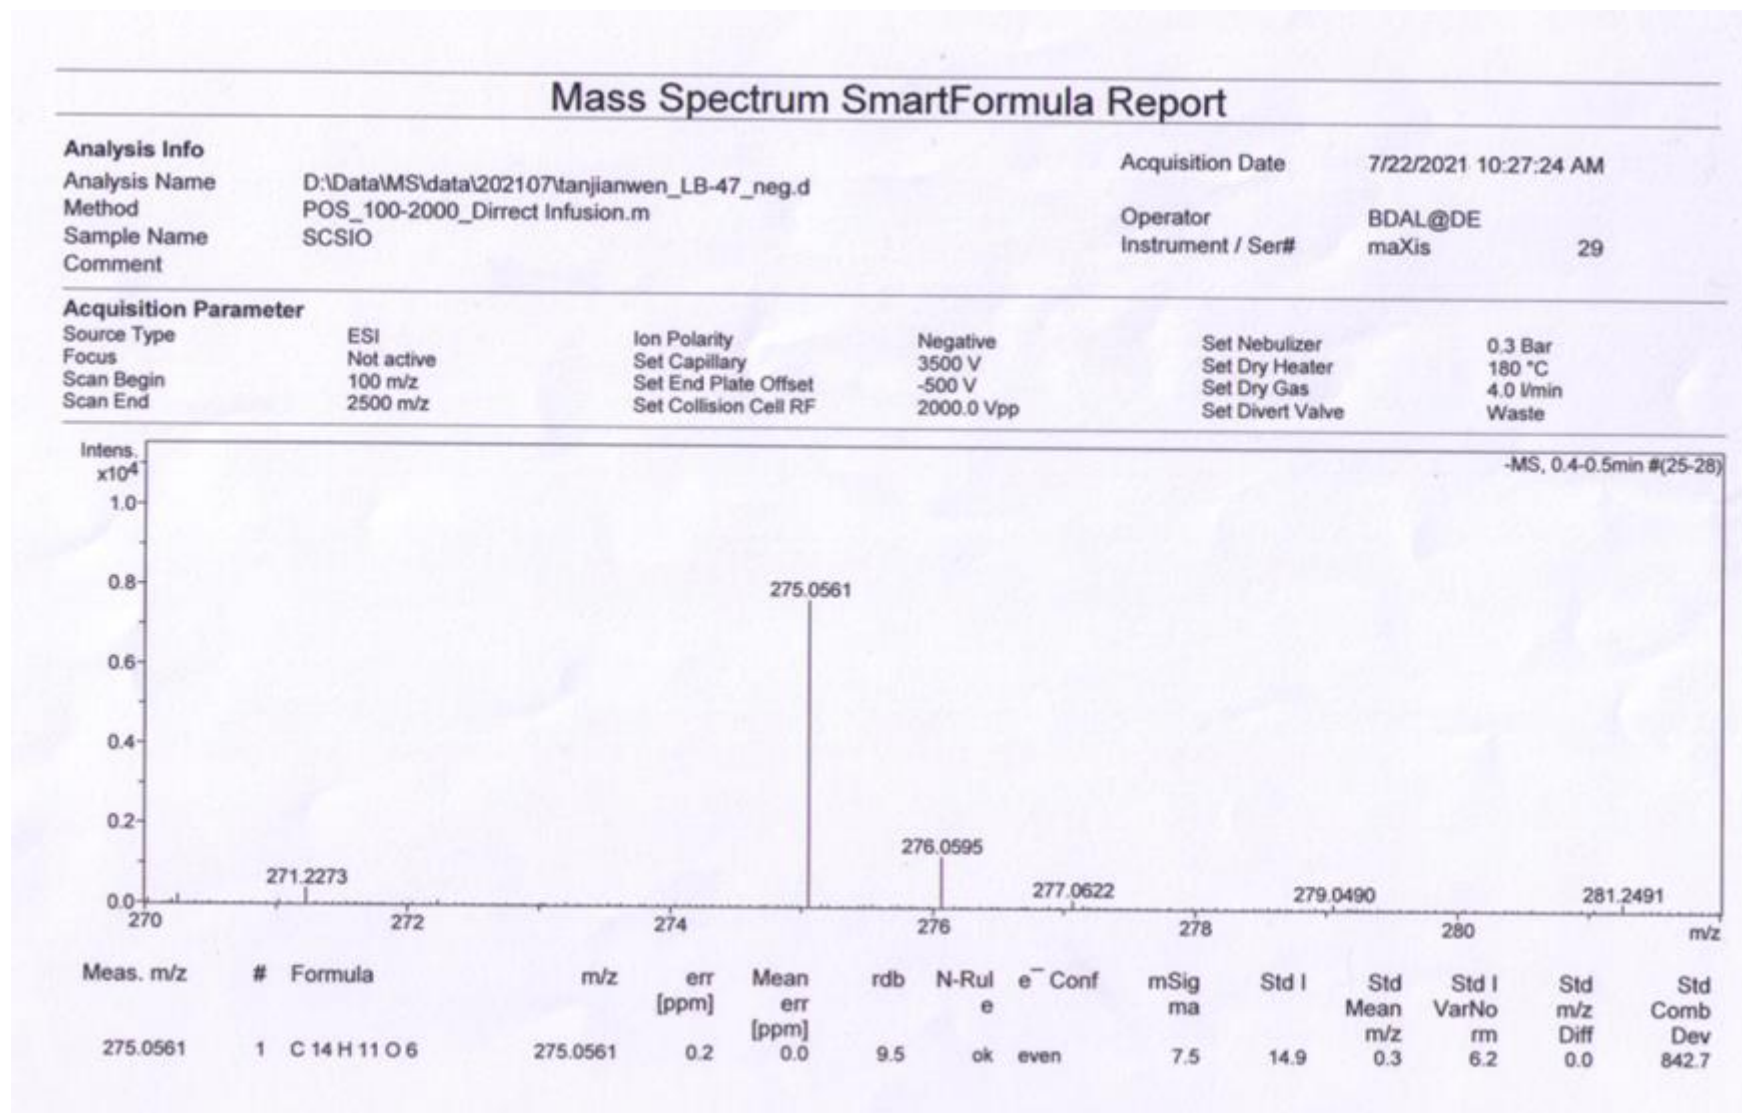



Figure S7:  $^1\text{H}$ -NMR spectrum of compound **2**

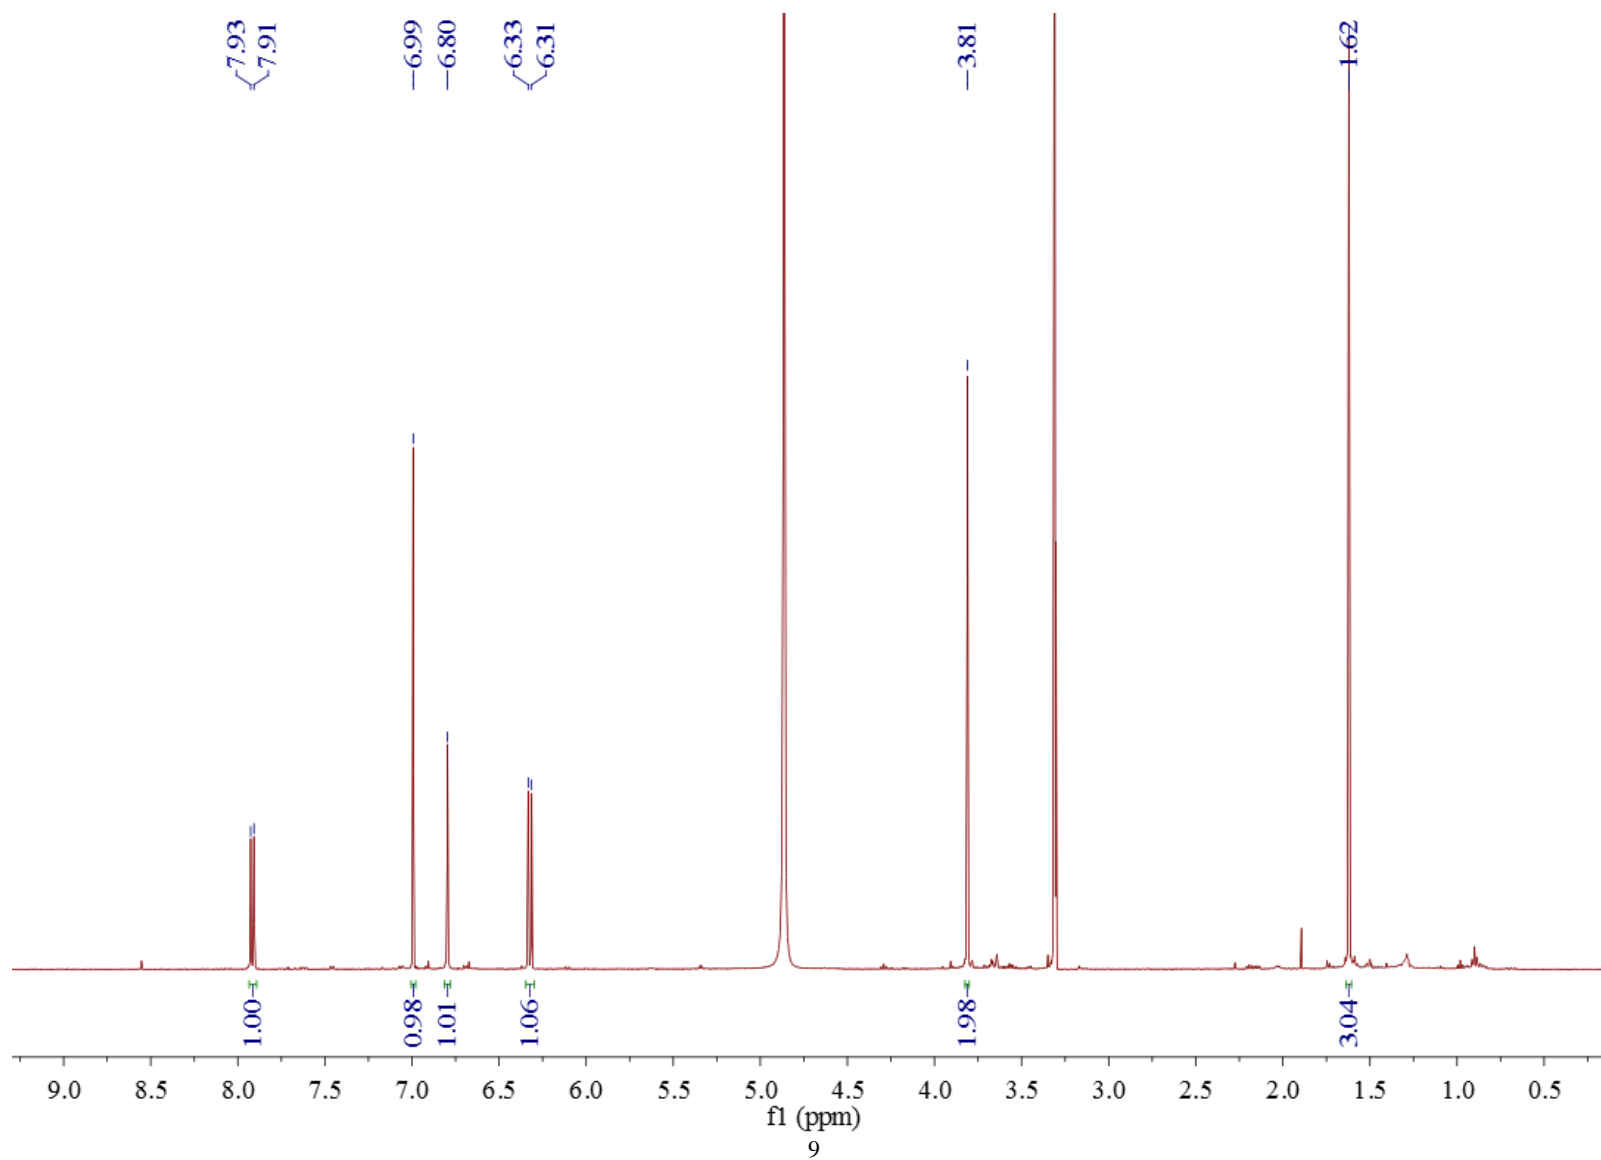

Figure S8:  $^{13}\text{C}$ -NMR spectrum of compound **2**

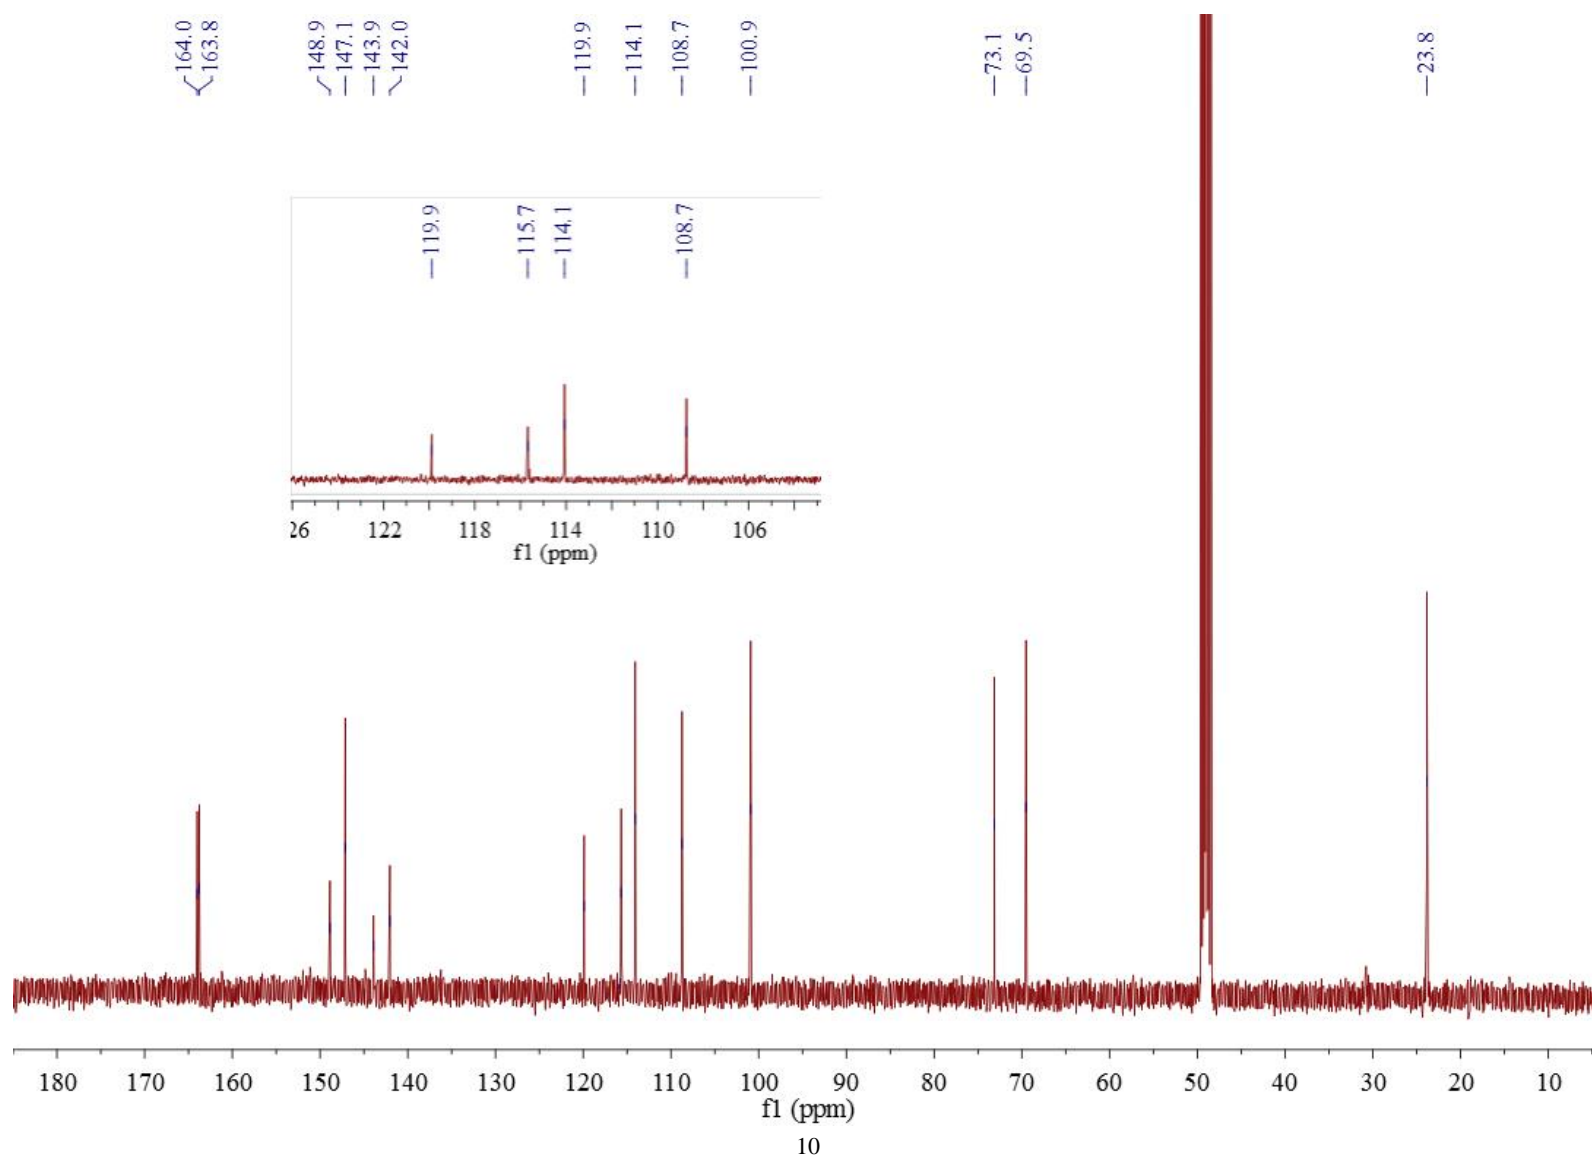

Figure S9: HSQC spectrum of compound **2**

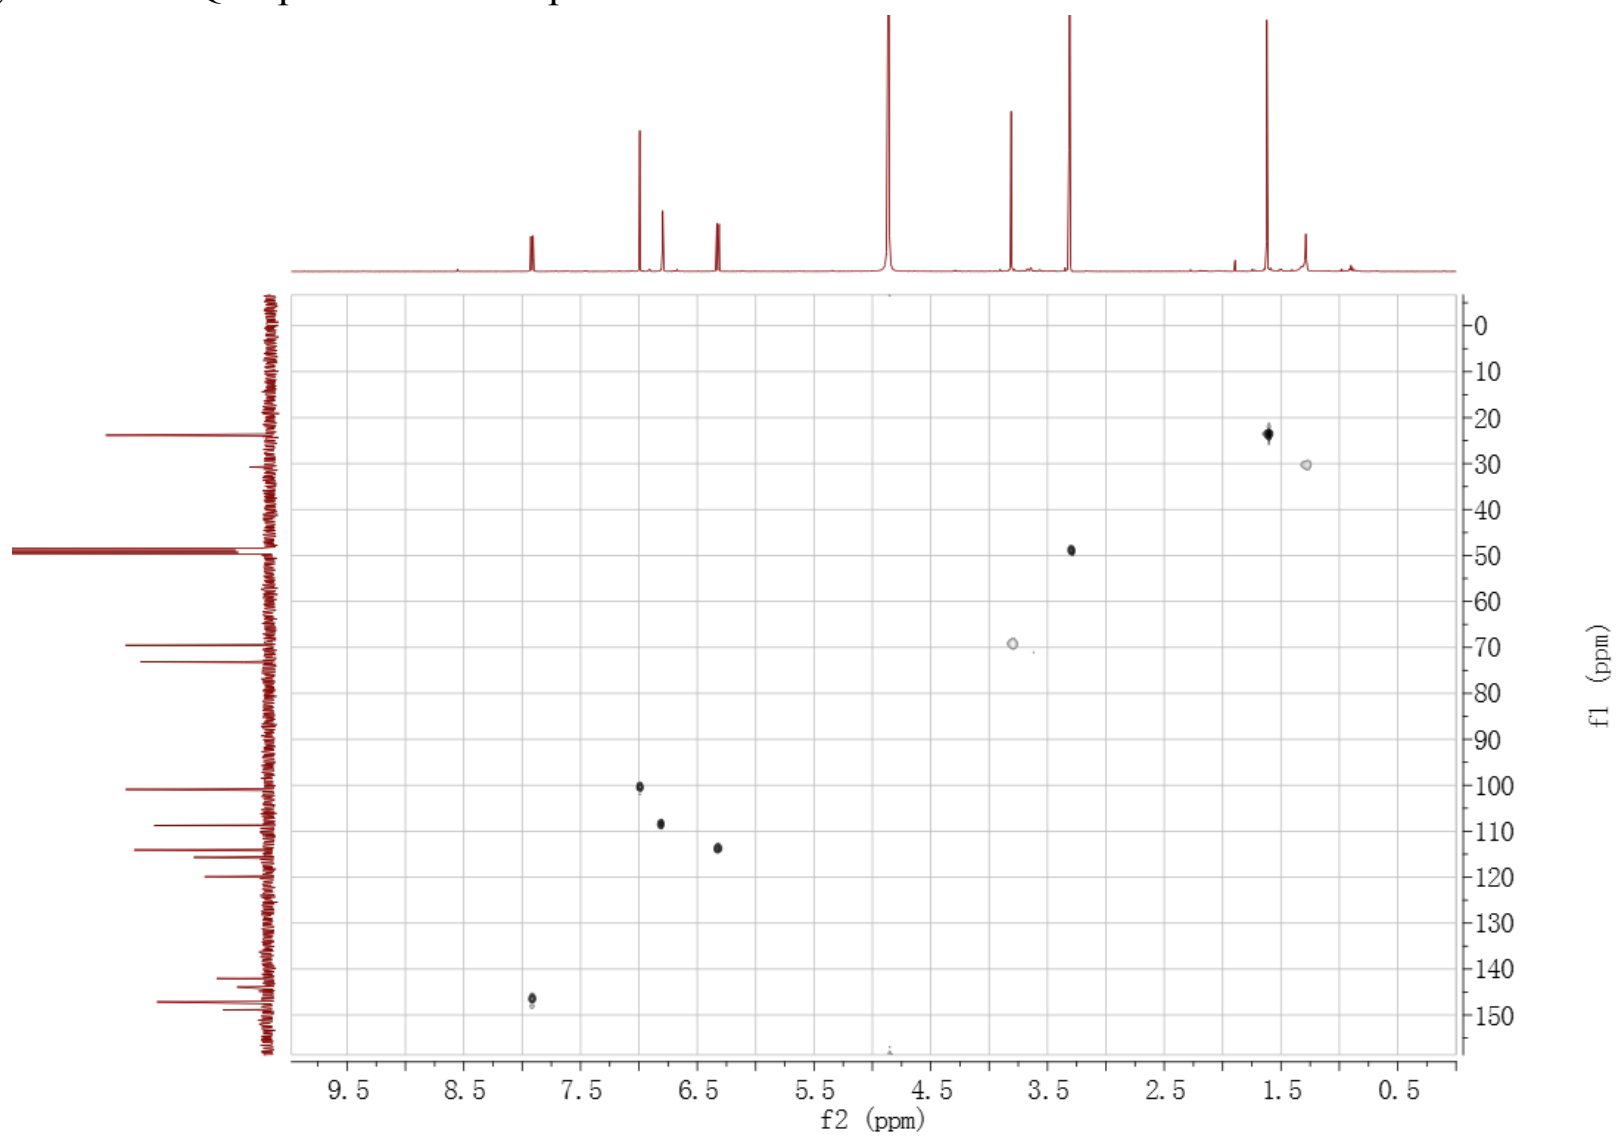

Figure S10: HMBC spectrum of compound **2**

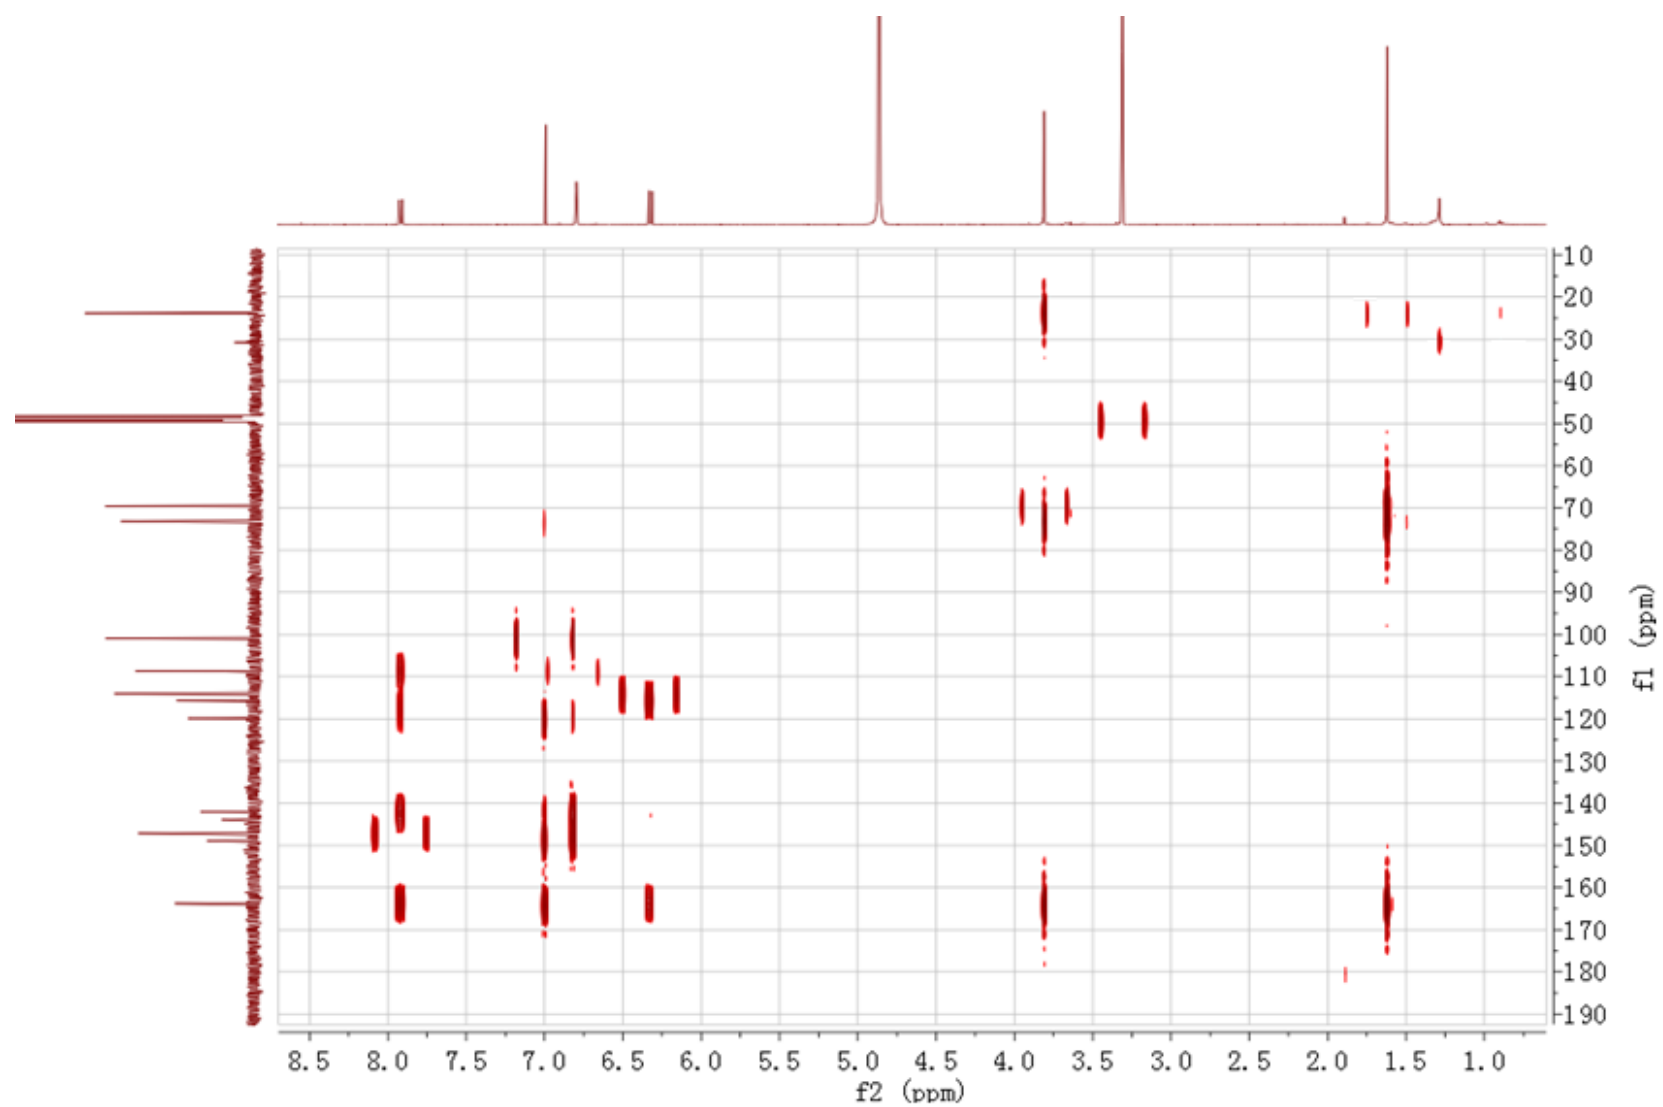

Figure S11: HR-ESI-MS(+) of compound **8**

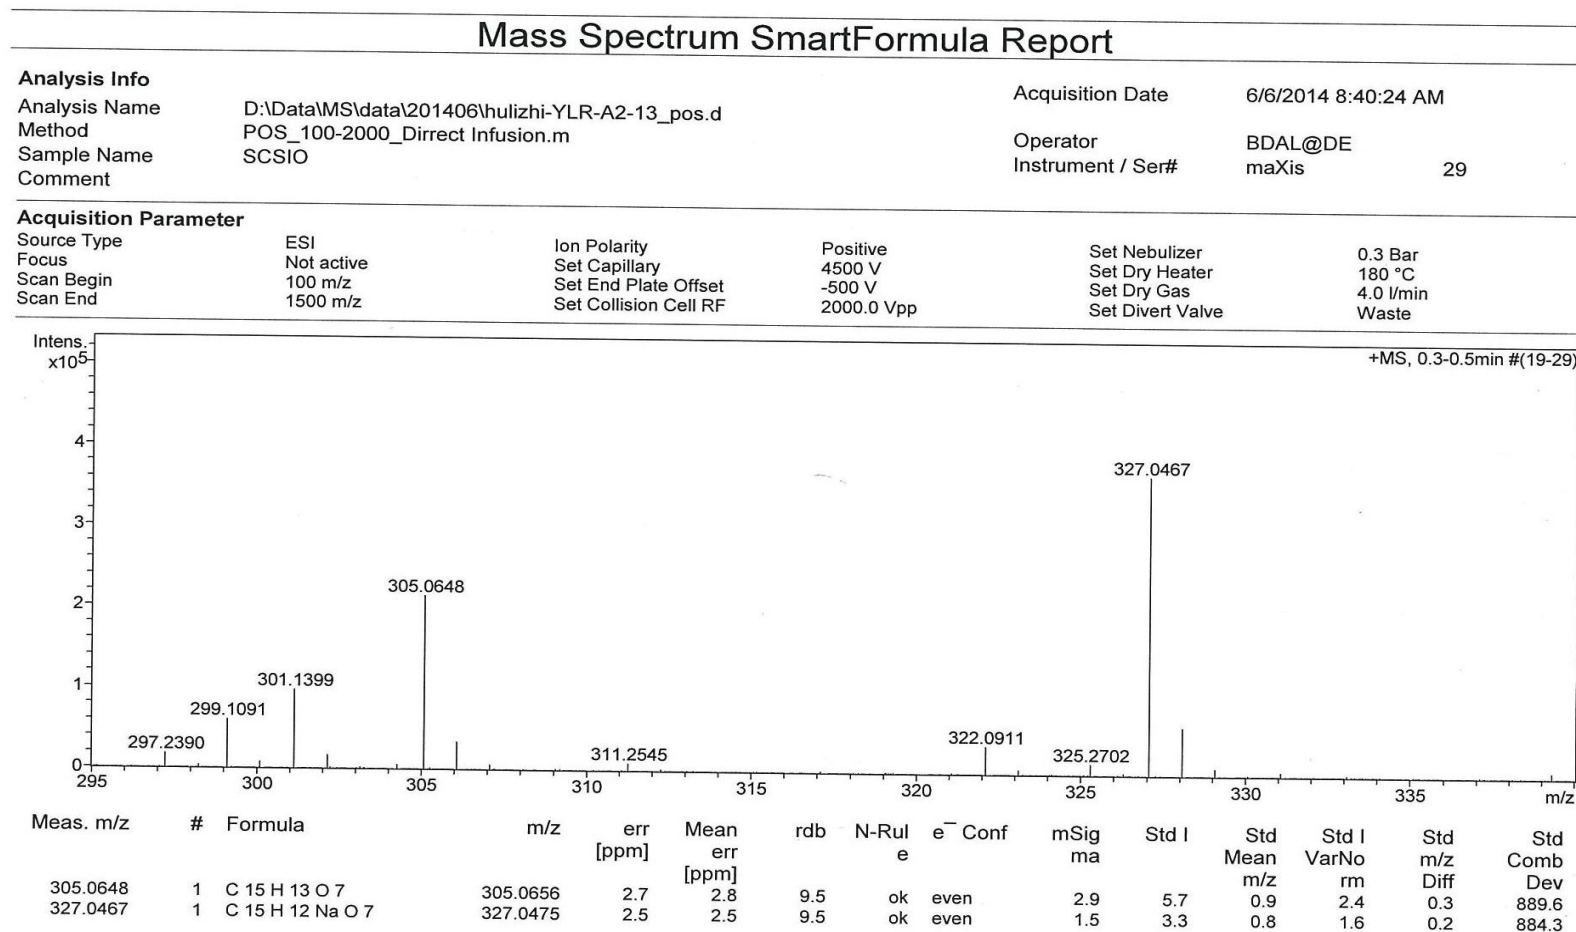

Figure S12:  $^1\text{H}$ -NMR spectrum of compound **8**

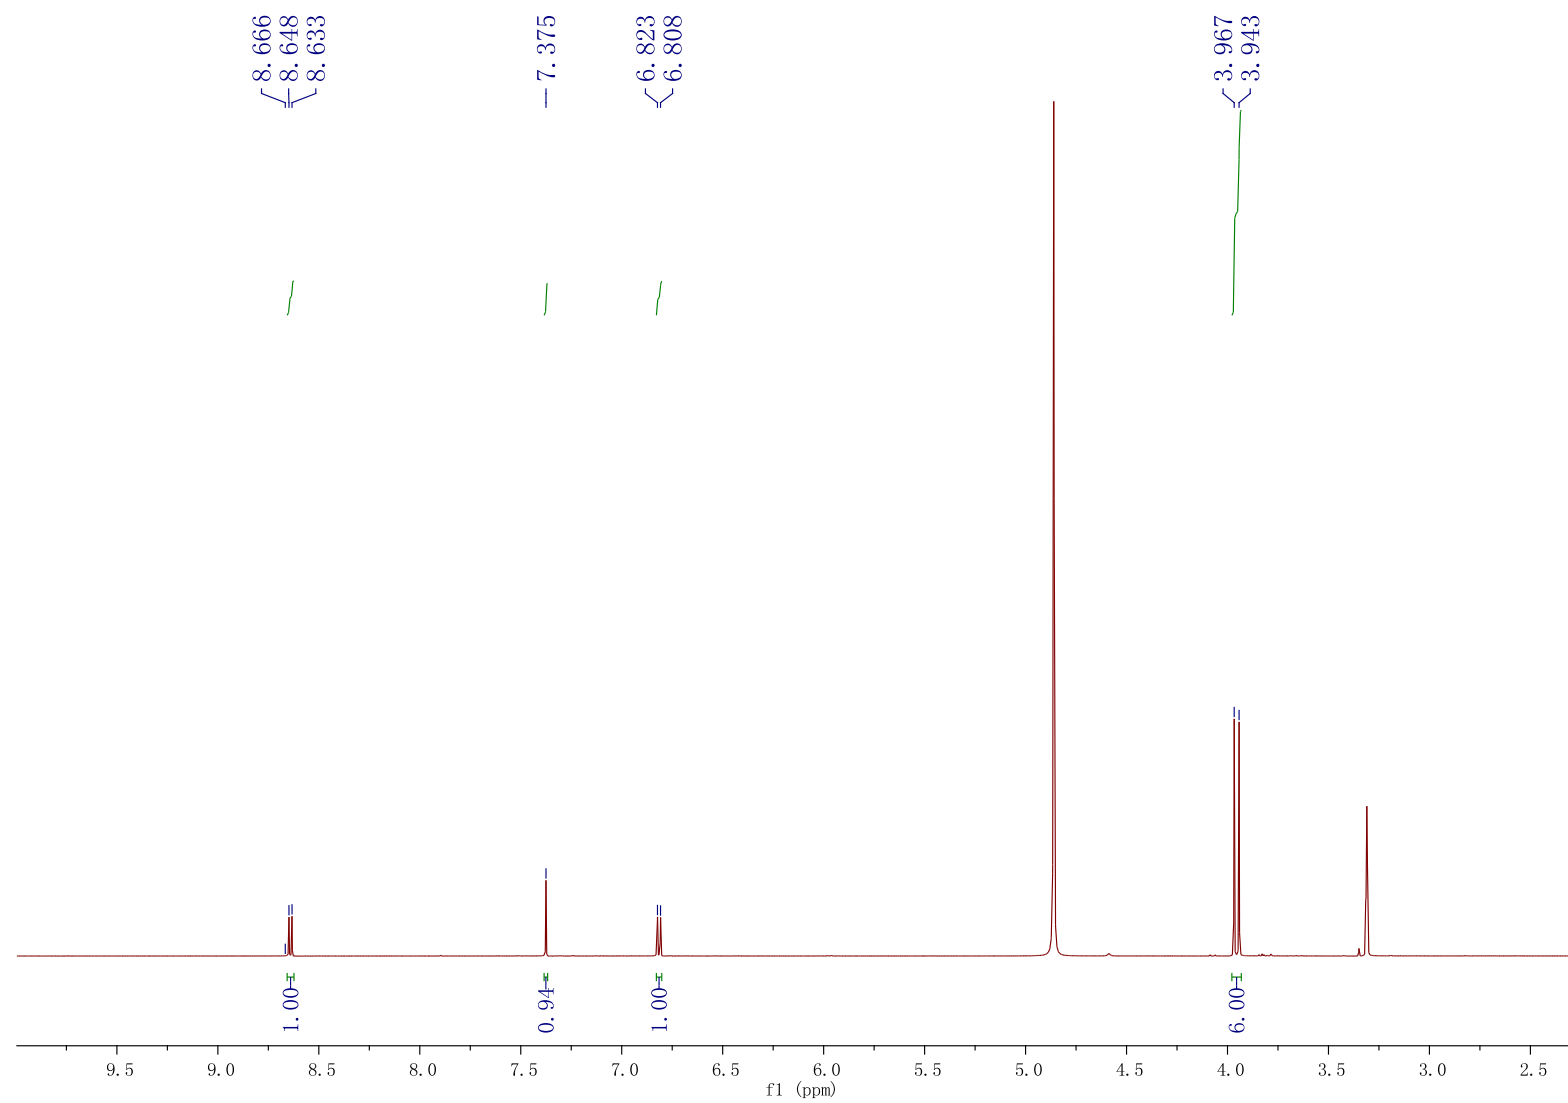

Figure S13:  $^{13}\text{C}$ -NMR spectrum of compound **8**

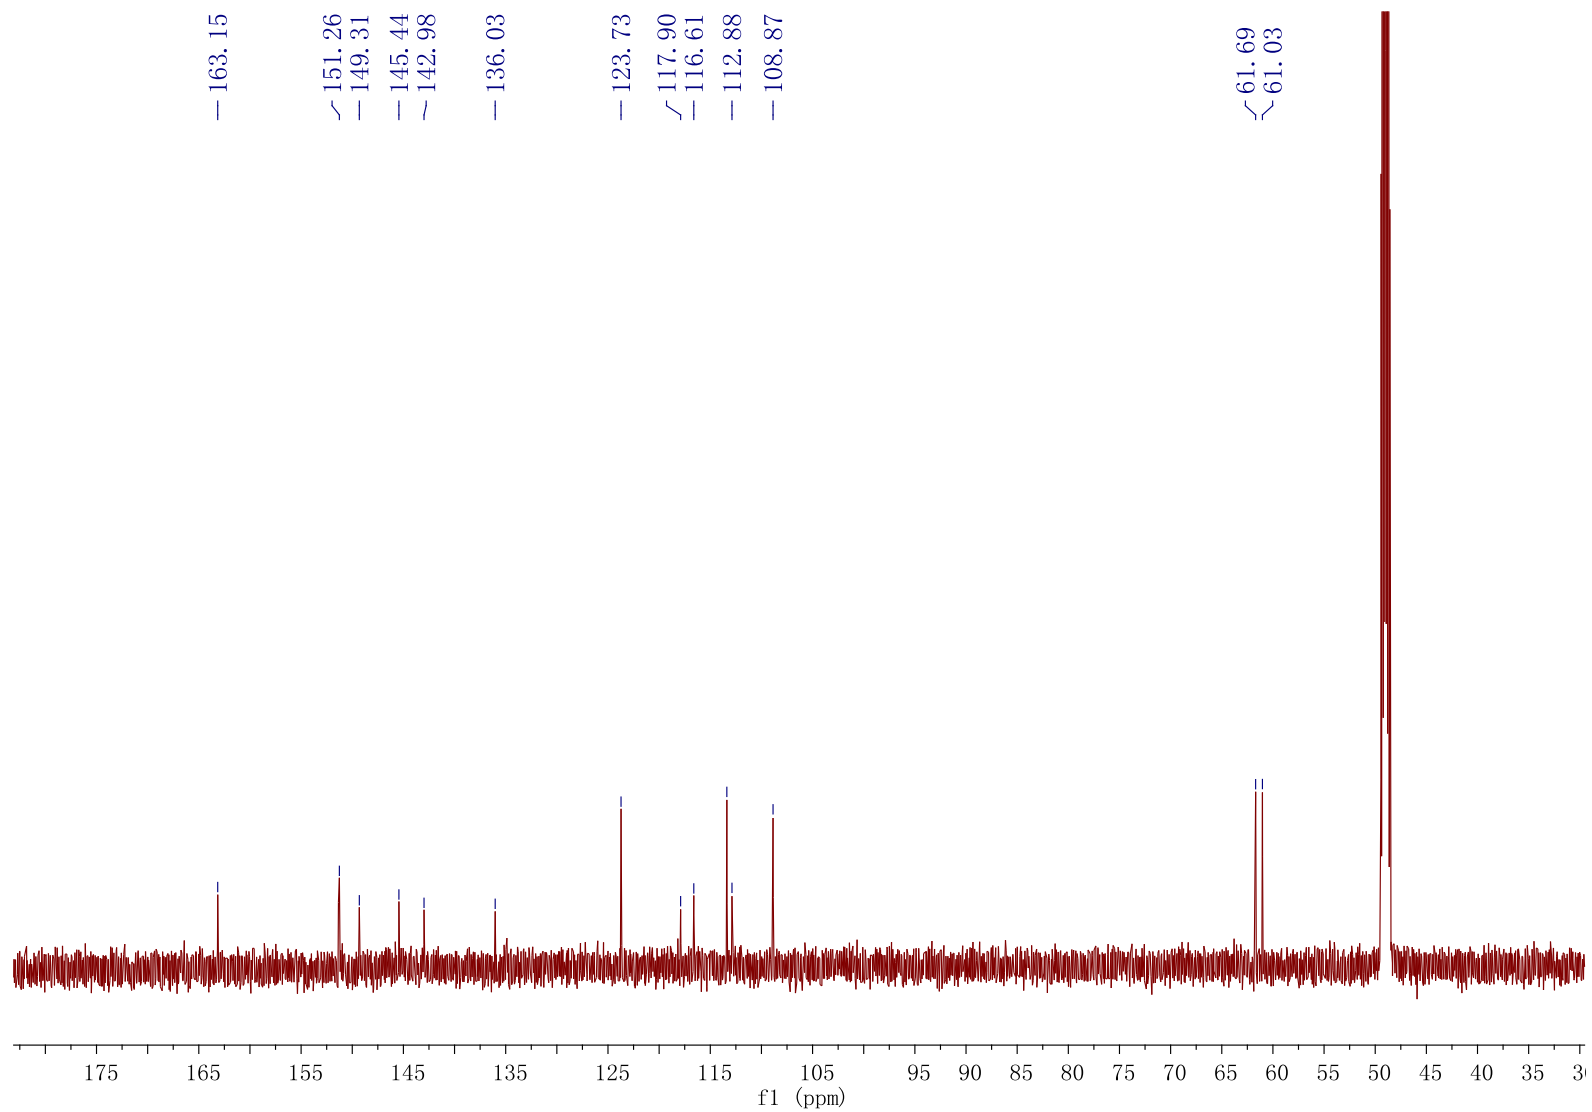

Figure S14: HSQC spectrum of compound **8**

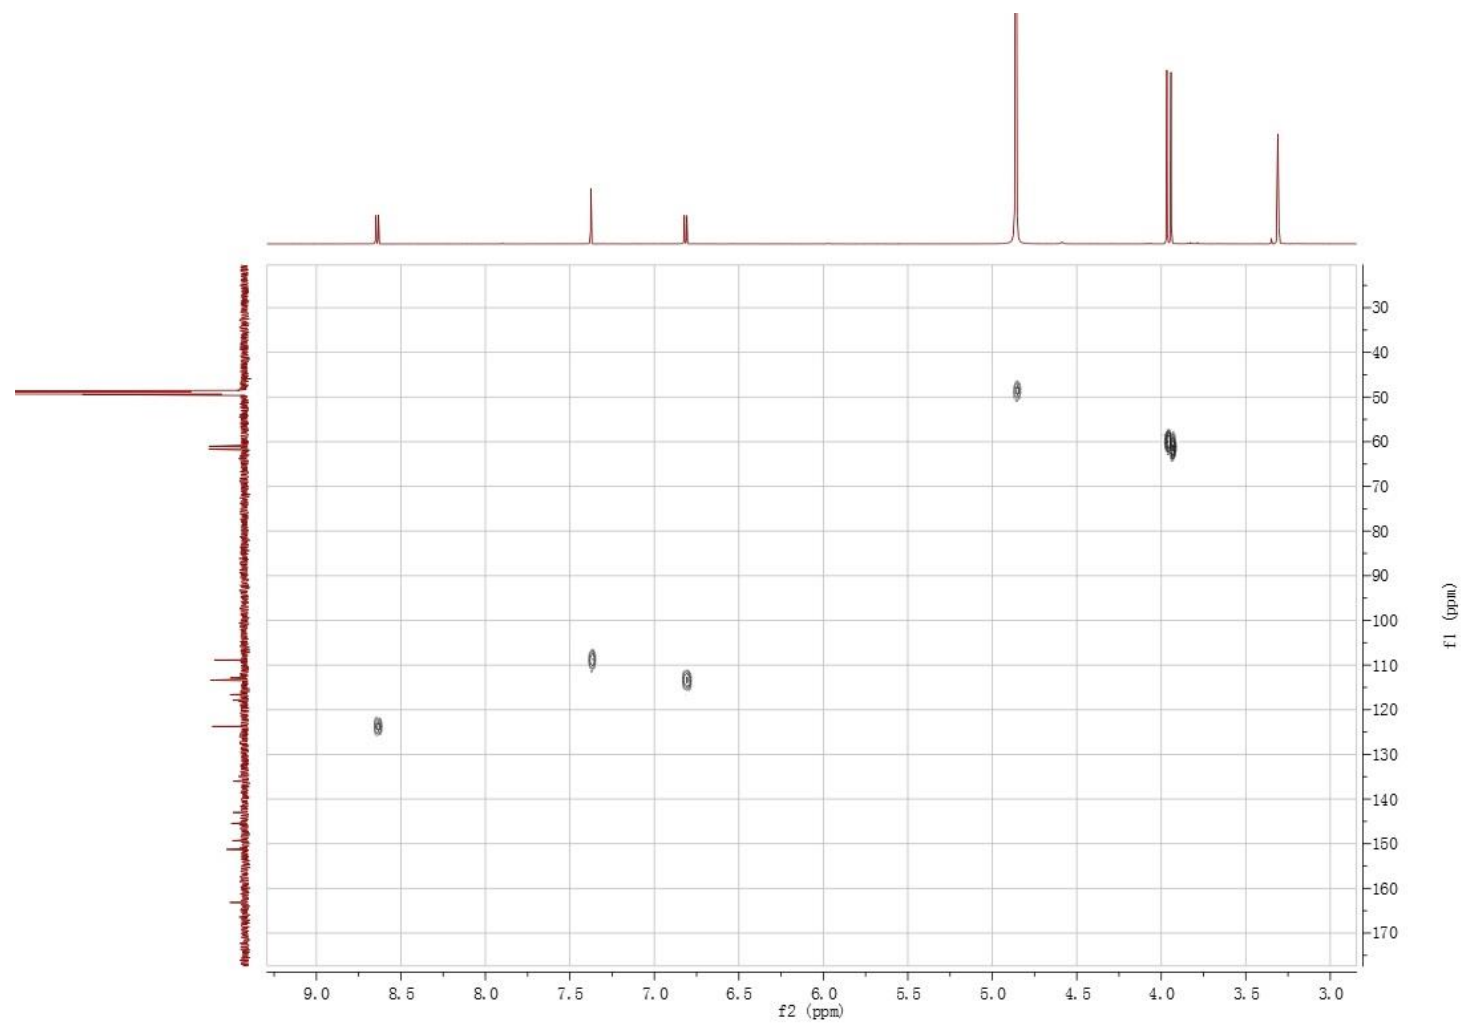



Figure S15: HMBC spectrum of compound **8**

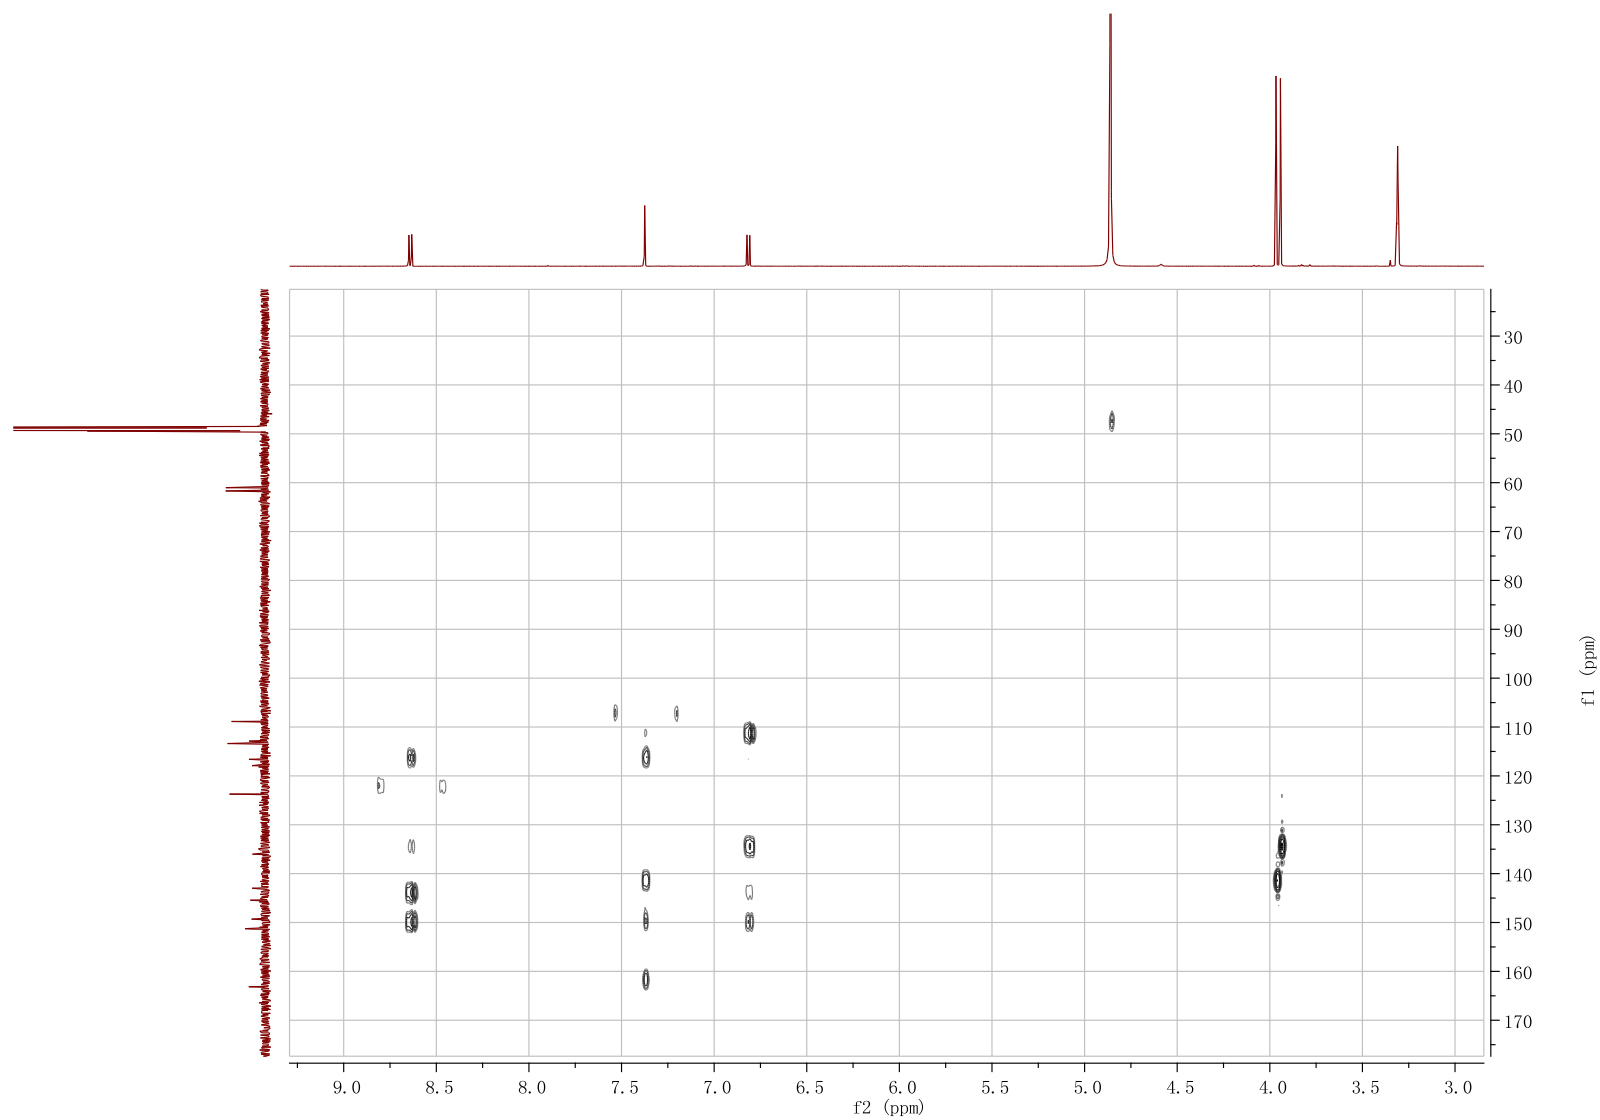

Supplement: s1 [file s1]
